# Supplementary material for: FcRn as a Transporter for Nasal Delivery of Biologics: A Systematic Review
Source: MDPI journal article supplement (doi:10.3390/ijms22126475), 2021-06-17
Supplement: s1 [file s1]

**Supplementary File S4.** Type of samples and protocols of the included *in vitro* and *ex vivo* studies.

| First author<br>Date                     | Design          | Species                        | Cell density, T°, rH,<br>number of samples                                 | Interface                                                                                                                   | Type of cells and samples and conditions of culture                                                                                                                                                                                                     | Permeation protocols                                                                                                                                                                                                                                        |
|------------------------------------------|-----------------|--------------------------------|----------------------------------------------------------------------------|-----------------------------------------------------------------------------------------------------------------------------|---------------------------------------------------------------------------------------------------------------------------------------------------------------------------------------------------------------------------------------------------------|-------------------------------------------------------------------------------------------------------------------------------------------------------------------------------------------------------------------------------------------------------------|
| <b>Röhm</b> <sup>[35]*</sup><br>2017     | <i>In vitro</i> | RPMI<br>cells                  | 2.10 <sup>5</sup> cells per insert<br>37°C, 5% CO <sub>2</sub>             | 24-well format<br>transwells                                                                                                | Cell line from a carcinoma from squamous epithelium obtained from a human nasal septum cultivated under submerged conditions and under ALI.                                                                                                             | Formulated proteins and FITC-dextran were aerosolized above the cells using a nebulization system.<br>After 90 or 240 min incubation time, abluminal medium was harvested to measure biotherapy concentration by either ELISA or fluorescence spectroscopy. |
| <b>Bequignon</b> <sup>[9]*</sup><br>2019 | <i>In vitro</i> | HNEC                           | 1.10 <sup>6</sup> cells per insert<br>37°C, pH 6                           | 12-well format<br>transwells                                                                                                | HNECs were isolated from nasal polyps obtained during endoscopic sinus surgery. The cells were cultivated under ALI conditions for 21 days to reach a steady well-differentiated state.                                                                 | Infliximab was added in the upper chamber.<br>After 4 h, medium from the lower chamber was harvested to measure biotherapy concentration via ELISA.                                                                                                         |
| <b>Ladel</b> <sup>[16]*</sup><br>2019    | <i>In vitro</i> | OEPC<br>and RPMI<br>cells      | 1.10 <sup>5</sup> cells per insert<br>37°C, 5% CO <sub>2</sub> ,<br>95% rH | NA                                                                                                                          | OEPC were harvested from mucosal explants from the dorsal part of the <i>concha nasalis dorsalis</i> and <i>medi</i> .<br>RPMI cells were obtained as described previously <sup>[35]</sup> .<br>Cells were cultivated under ALI conditions for 21 days. | pIgG and hIgG were added in the upper chamber.<br>After 48 h, 20 µL of the abluminal medium was harvested at 0.5, 2, 4, 8, 12, 24 and 48 h to measure biotherapy concentration via ELISA.                                                                   |
|                                          | <i>Ex vivo</i>  | Porcine<br>olfactory<br>mucosa | N = 4<br>35 °C, 90% rH                                                     | self-made side-by-side<br>cell system consisting<br>of two 1.5 mL<br>microreaction tubes                                    | Tissue specimens (2 cm <sup>2</sup> ) were excised from the <i>concha nasalis media</i> of 4 to 6 months old slaughterhouse pigs.                                                                                                                       | pIgG and hIgG were applied on the epithelial layer.<br>After 5 h, mucosa explants were fixed in PFA for immunofluorescence staining and western blotting.                                                                                                   |
| <b>Samson</b> <sup>[46]*</sup><br>2012   | <i>Ex vivo</i>  | Porcine<br>nasal<br>mucosa     | N = 7                                                                      | Mucosal specimens<br>were mounted in<br>vertical static diffusion<br>cells with a surface area<br>of 0.77 cm <sup>2</sup> . | Samples from nasal mucosa specimens isolated from porcine snouts obtained from a slaughterhouse.                                                                                                                                                        | Surface of the nasal septum and cavity specimen was treated with a single topical exposure of bevacizumab.<br>After 2.5 h, the receptor compartment was harvested every 30 minutes to measure biotherapy concentration via ELISA.                           |
| <b>Heidl</b> <sup>[10]*</sup><br>2015    | <i>Ex vivo</i>  | HNEC                           | N = 7                                                                      | 4µm-thin sections were<br>deparaffinized and<br>rehydrated for antigen<br>retrieval                                         | Samples from the inferior turbinate of patients undergoing routine turbinate surgery were obtained from the department of otorhinolaryngology.                                                                                                          | Small pieces of tissue were fixed and paraffin-embedded for immunofluorescence microscopy and western blotting.                                                                                                                                             |
| <b>Ladel</b> <sup>[15]*</sup><br>2018    | <i>Ex vivo</i>  | Porcine<br>olfactory<br>mucosa | N = 4<br>35 °C, 90% rH                                                     | self-made side-by-side<br>cell system consisting<br>of two 1.5 mL<br>microreaction tubes                                    | Tissue specimens (2 cm <sup>2</sup> ) were excised from the <i>concha nasalis dorsalis</i> and <i>ventralis</i> of 4 to 6 months old slaughterhouse pigs.                                                                                               | pIgG and hIgG were applied on the epithelial layer.<br>After 30 min, 2 h, 4 h or 8 h, mucosa explants were fixed in PFA for Immunofluorescence staining and microscopy analysis.                                                                            |

Abbreviations: ALI, Air liquid interface; ELISA, enzyme-linked immunosorbent assay; FcRn, neonatal Fc Receptor; FITC-dextran, Fluorescein isothiocyanate-dextran; HNEC, Human Nasal Epithelial Cell; hIgG, human Immunoglobulin G; NA, Not available; OEPC, primary cells from porcine olfactory epithelium; PFA, paraformaldehyde; pIgG, porcine IgG; RPMI cells, carcinoma from squamous epithelium obtained from a human nasal septum; rH, relative Humidity; T°, Temperature.
