# Supplementary material for: FcRn as a Transporter for Nasal Delivery of Biologics: A Systematic Review
Source: MDPI journal article supplement (doi:10.3390/ijms22126475), 2021-06-17
Supplement: s1 [file s1]

**Supplementary File S2.** Detailed Risk of Bias Using OHAT.

| Study                            |                                                                | Selection bias                                       |                                                                              | Cofounding bias                                                                             | Performance bias                                            |                                                                                             | Attrition bias                                                           | Detection bias                                        |                                                | Selective reporting bias             | Other bias                                                   |
|----------------------------------|----------------------------------------------------------------|------------------------------------------------------|------------------------------------------------------------------------------|---------------------------------------------------------------------------------------------|-------------------------------------------------------------|---------------------------------------------------------------------------------------------|--------------------------------------------------------------------------|-------------------------------------------------------|------------------------------------------------|--------------------------------------|--------------------------------------------------------------|
|                                  | Was administered dose or exposure level adequately randomized? | Was allocation to study groups adequately concealed? | Did selection of study participants result in appropriate comparison groups? | Did the study design or analysis account for important confounding and modifying variables? | Were experimental conditions identical across study groups? | Were the research personnel and human subjects blinded to the study group during the study? | Were outcome data complete without attrition or exclusion from analysis? | Can we be confident in the exposure characterization? | Can we be confident in the outcome assessment? | Were all measured outcomes reported? | Were there no other potential threats to internal validity ? |
| Rawool <sup>[27]</sup> , 2008    | Definitely High risk of bias                                   | Definitely High risk of bias                         | Not relevant                                                                 | Not relevant                                                                                | Probably high                                               | Definitely high                                                                             | Probably low                                                             | Probably low                                          | Probably low                                   | Probably low                         | Probably low                                                 |
| Lu <sup>[28]</sup> , 2011        | Definitely High risk of bias                                   | Definitely High risk of bias                         | Not relevant                                                                 | Not relevant                                                                                | Definitely Low                                              | Definitely high                                                                             | Probably low                                                             | Definitely low                                        | Probably low                                   | Definitely low                       | Probably low                                                 |
| Ye <sup>[29]</sup> , 2011        | Definitely High risk of bias                                   | Definitely High risk of bias                         | Not relevant                                                                 | Not relevant                                                                                | Definitely Low                                              | Definitely high                                                                             | Definitely low                                                           | Definitely low                                        | Definitely low                                 | Definitely low                       | Probably low                                                 |
| Bitsaktis <sup>[69]</sup> , 2015 | Definitely High risk of bias                                   | Definitely High risk of bias                         | Not relevant                                                                 | Not relevant                                                                                | Definitely Low                                              | Definitely high                                                                             | Definitely low                                                           | Probably low                                          | Probably low                                   | Definitely low                       | Probably low                                                 |
| Kumar <sup>[61]</sup> , 2018     | Definitely High risk of bias                                   | Definitely High risk of bias                         | Not relevant                                                                 | Not relevant                                                                                | Definitely Low                                              | Definitely high                                                                             | Probably low                                                             | Probably low                                          | Probably low                                   | Probably low                         | Probably high                                                |
| Bern <sup>[26]</sup> , 2020      | Definitely High risk of bias                                   | Definitely High risk of bias                         | Not relevant                                                                 | Not relevant                                                                                | Definitely Low                                              | Definitely high                                                                             | Definitely low                                                           | Probably low                                          | Probably low                                   | Definitely low                       | Probably low                                                 |
| Rohm <sup>[35]</sup> , 2017      | Definitely High risk of bias                                   | Definitely High risk of bias                         | Not relevant                                                                 | Not relevant                                                                                | Definitely Low                                              | Definitely high                                                                             | Definitely low                                                           | Probably low                                          | Probably low                                   | Definitely low                       | Probably low                                                 |
| Bequignon <sup>[9]</sup> , 2019  | Definitely High risk of bias                                   | Definitely High risk of bias                         | Not relevant                                                                 | Not relevant                                                                                | Definitely Low                                              | Definitely high                                                                             | Definitely low                                                           | Probably low                                          | Probably low                                   | Definitely low                       | Probably low                                                 |
| Ladel <sup>[16]</sup> , 2019     | Definitely High risk of bias                                   | Definitely High risk of bias                         | Not relevant                                                                 | Not relevant                                                                                | Probably high                                               | Definitely high                                                                             | Probably low                                                             | Probably low                                          | Probably low                                   | Definitely low                       | Probably low                                                 |
| Samson <sup>[46]</sup> , 2012    | Definitely High risk of bias                                   | Definitely High risk of bias                         | Not relevant                                                                 | Not relevant                                                                                | Probably low                                                | Definitely high                                                                             | Definitely low                                                           | Definitely low                                        | Definitely low                                 | Definitely low                       | Probably low                                                 |
| Heidl <sup>[10]</sup> , 2015     | Definitely High risk of bias                                   | Definitely High risk of bias                         | Not relevant                                                                 | Not relevant                                                                                | Probably low                                                | Definitely high                                                                             | Probably low                                                             | Probably high                                         | Probably low                                   | Probably low                         | Probably low                                                 |
| Ladel <sup>[15]</sup> , 2018     | Definitely High risk of bias                                   | Definitely High risk of bias                         | Not relevant                                                                 | Not relevant                                                                                | Probably high                                               | Definitely high                                                                             | Probably low                                                             | Probably low                                          | Probably low                                   | Definitely low                       | Probably low                                                 |
