# Supplementary material for: FcRn as a Transporter for Nasal Delivery of Biologics: A Systematic Review
Source: MDPI journal article supplement (doi:10.3390/ijms22126475), 2021-06-17
Supplement: s1 [file s1]

**Supplementary File S3.** Type of Samples and Protocols of the Included In Vivo Studies.

| First author Date                          | Design         | Species | Age        | N          | Type of samples and modifications                                                                                                                                                                    | Protocols                                                                                                                                                                                                                                                                                                                  |
|--------------------------------------------|----------------|---------|------------|------------|------------------------------------------------------------------------------------------------------------------------------------------------------------------------------------------------------|----------------------------------------------------------------------------------------------------------------------------------------------------------------------------------------------------------------------------------------------------------------------------------------------------------------------------|
| <b>Rawool<sup>[27]*</sup><br/>2008</b>     | <i>In vivo</i> | Mice    | 6-8 weeks  | 15-18 mice | <b>BALB/c and C57BL/6 mice</b> (Taconic Farms)<br><b>IgA-/-</b> mice (B6.129, Albany Medical College, NY)<br><b>FcRn -/-</b> mice (B6.129×1-Fcrgttm1Dcr/Dcr, the Jackson Laboratory, Bar Harbor, ME) | Day 0 : intranasal immunization with mAb-iFT, iFT or PBS<br>Day 21 : intranasal immunization boost<br>Day 35 : Intranasally challenged with FT LVS or FT SchuS4<br>Survival monitoring during at least 21 days.                                                                                                            |
| <b>Lu<sup>[28]*</sup><br/>2011</b>         | <i>In vivo</i> | Mice    | 6-8 weeks  | 20 mice    | <b>C57BL/6 mice</b> (National Cancer Institute or Charles River)<br><b>FcRn -/-</b> mice (B6.129, the Jackson Laboratory, Bar Harbor, ME)                                                            | Day 0 : intranasal immunization with Gag-Fc/wt, Gag-Fc/mut, or Gag-CPG or PBS<br>Day 14 : intranasal immunization boost<br>Day 42 : Intravaginally challenged with HIV-1<br>Day 47 : Ovary were harvested, and virus titers measured<br>Month 4 : IgG antibody titers in serum were measured and splenocytes were isolated |
| <b>Ye<sup>[29]*</sup><br/>2011</b>         | <i>In vivo</i> | Mice    | 6-8 weeks  | 20 mice    | <b>C57BL/6 mice</b> (National Cancer Institute or Charles River)<br><b>FcRn -/-</b> mice (B6.129, the Jackson Laboratory, Bar Harbor, ME)                                                            | Day 0 : intranasal immunization with gD-Fc/WT, gD-Fc/Mut, gD-CPG or PBS<br>Day 14 : intranasal immunization boost<br>Day 50 : Intravaginally challenged with a lethal dose of HSV-2<br>Survival monitoring during at least 15 days.<br>Month 6 : Intravaginally challenged immunized mice with a lethal dose HSV-2         |
| <b>Bitsatksis<sup>[69]*</sup><br/>2015</b> | <i>In vivo</i> | Mice    | 8-12 weeks | 15-18 mice | <b>C57BL/6 mice</b> (Taconic Laboratories, Hudson, NY)<br><b>IL-12p35 -/-</b> mice (B6.129S1-IL12atm1Jm/J, the Jackson Laboratory, Bar Harbor, ME)                                                   | Day 0 : intranasal immunization with mAb-iFT, iFT or F(ab') <sub>2</sub> -iFT<br>Day 21 : intranasal immunization boost<br>Day 35 : Intranasally challenged with FT LVS<br>Survival monitoring during for 21 to 25 days.                                                                                                   |
| <b>Kumar<sup>[61]*</sup><br/>2018</b>      | <i>In vivo</i> | Rats    | NA         | NA         | <b>Sprague-Dawley rats</b> (180-200g, Envigo)                                                                                                                                                        | Anesthetized and canulated in the abdominal aorta<br>30 minutes after intranasal and intra-arterial delivery<br>- CSF withdrawal, then euthanized for perfusion-fixation of tissue<br>- Blood sampling at 10 minutes intervals<br>- Analysis of IgG quality using SDS-PAGE                                                 |
| <b>Bern<sup>[26]*</sup><br/>2020</b>       | <i>In vivo</i> | Mice    | 6-8 weeks  | 30-35 mice | <b>C57BL/6 and BALB/c mice</b><br><b>Tg32 Alb -/-</b> mice<br><b>FcRn -/-</b> mice and <b>Alb -/- FcRn -/-</b> mice<br><b>hFcRn +/- FcRn -/-</b><br>(the Jackson laboratory, Bar Harbor, ME)         | Pulmonary delivery study and half-life study<br>Day 0 : Preloaded with human albumin or human IgG<br>Day 2 : intranasal delivery of biotinylated albumin (WT, KAHQ or QMP) or IgG1 or scFv-Alb-WT or scFv-QMP<br>-Blood sampling after 4, 8, 24, 96, 168 & 360h (Alb) and 4, 8, 24, 30 & 48h (Alb and IgG1)                |

Abbreviations: Alb, Albumin; CSF, Cerebro spinal fluid; CPG, CpG ODN1826 (5'-TCCATGACGTTCTGACGTT-3'; Invivogen, San Diego, CA); FcRn, neonatal Fc Receptor; Gag-Fc, fusion of p24 protein from HIV Gag with IgG heavy chain; hFcRn, human FcRn; HIV, Human immunodeficiency virus; IgG, Immunoglobulin G; IL, interleukin; iFT, inactivated Francisella Tularensis; KO, knock-out; LVS, Live vaccine strain; mAb, Monoclonal Antibody; mut, mutant; NA, Not available; PBS, Phosphate Buffer Saline; QMP, triple mutant E505Q/T527M/K573P Albumin engineered; scFv, single-chain variable fragment; SDS-PAGE, sodium dodecyl sulfate polyacrylamide gel electrophoresis; WT, Wild-Type.
